# Supplementary material for: Ionothermal synthesis of two novel metal organophosphonates
Source: Royal Society of Chemistry journal article supplement (doi:10.1039/b813731e), 2008-12-02
Supplement: b813731e.pdf [file b813731e.pdf]

## Ionothermal synthesis of two novel metal organophosphonates

Peter J. Byrne,<sup>a\*</sup> David S. Wragg,<sup>a</sup> John E. Warren<sup>b</sup> Russell E. Morris<sup>\*a</sup>

### Supplementary information.

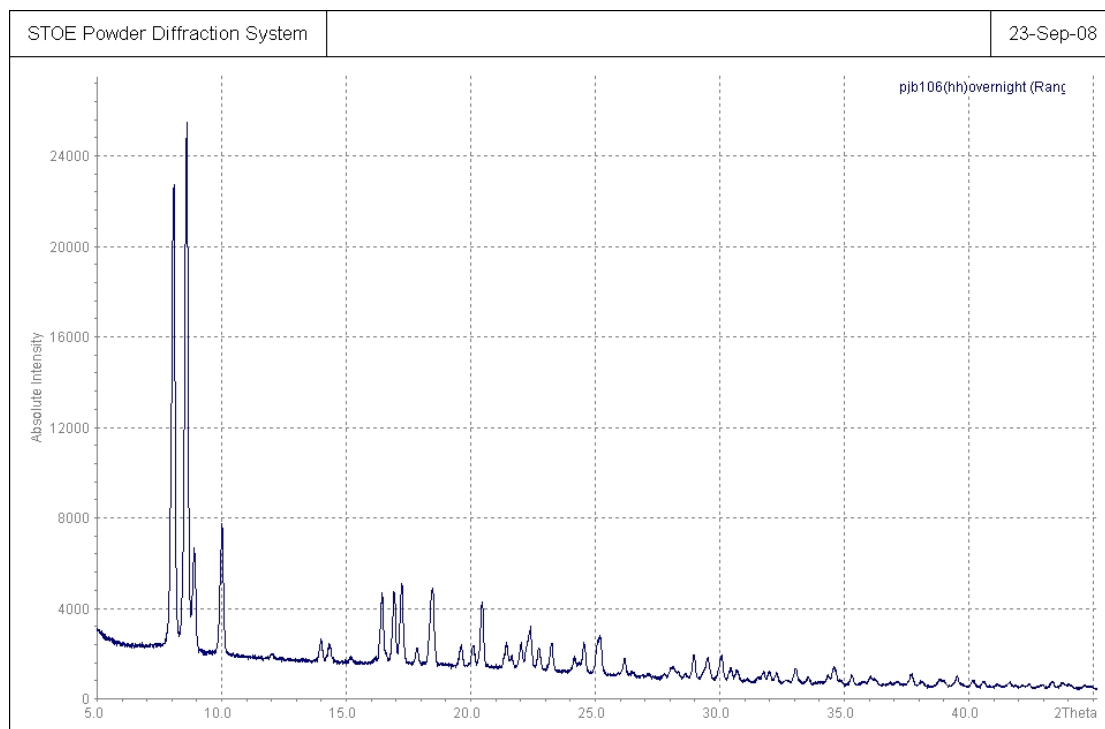

**Figure 1:** Powder diffraction of compound 1.

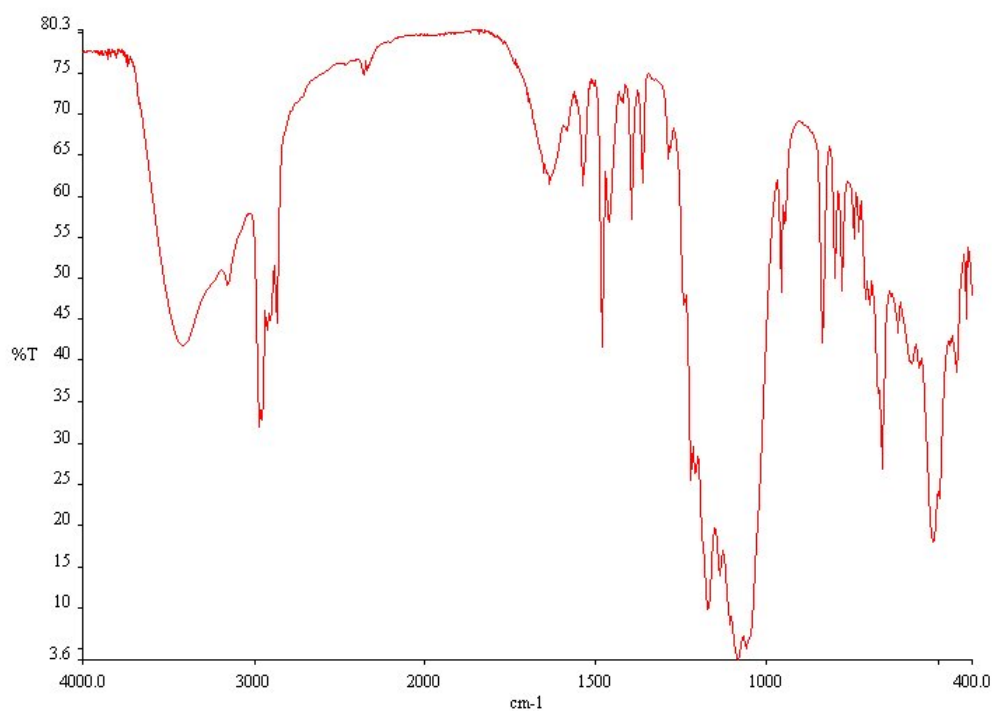

**Figure 2:** IR of compound 1 with characteristic hydroxyl peak at  $3500\text{cm}^{-1}$ .

**Table 1:** Hydrogen bond table for compound 1, bond, bond length and angles.

|                    |      |      |           |     |
|--------------------|------|------|-----------|-----|
| C86 -- H1A .. O1   | 0.96 | 2.6  | 3.268(10) | 127 |
| C43 -- H6C .. O34  | 0.96 | 2.5  | 3.179(12) | 128 |
| C20 -- H20B .. O32 | 0.96 | 2.59 | 3.000(13) | 106 |
| C20 -- H20C .. O34 | 0.96 | 2.54 | 3.456(12) | 161 |
| C72 -- H21 .. O32  | 0.93 | 2.53 | 2.925(12) | 106 |
| C74 -- H23 .. O15  | 0.93 | 2.57 | 2.950(16) | 105 |
| C31 -- H26A .. O31 | 0.96 | 2.53 | 2.995(14) | 109 |

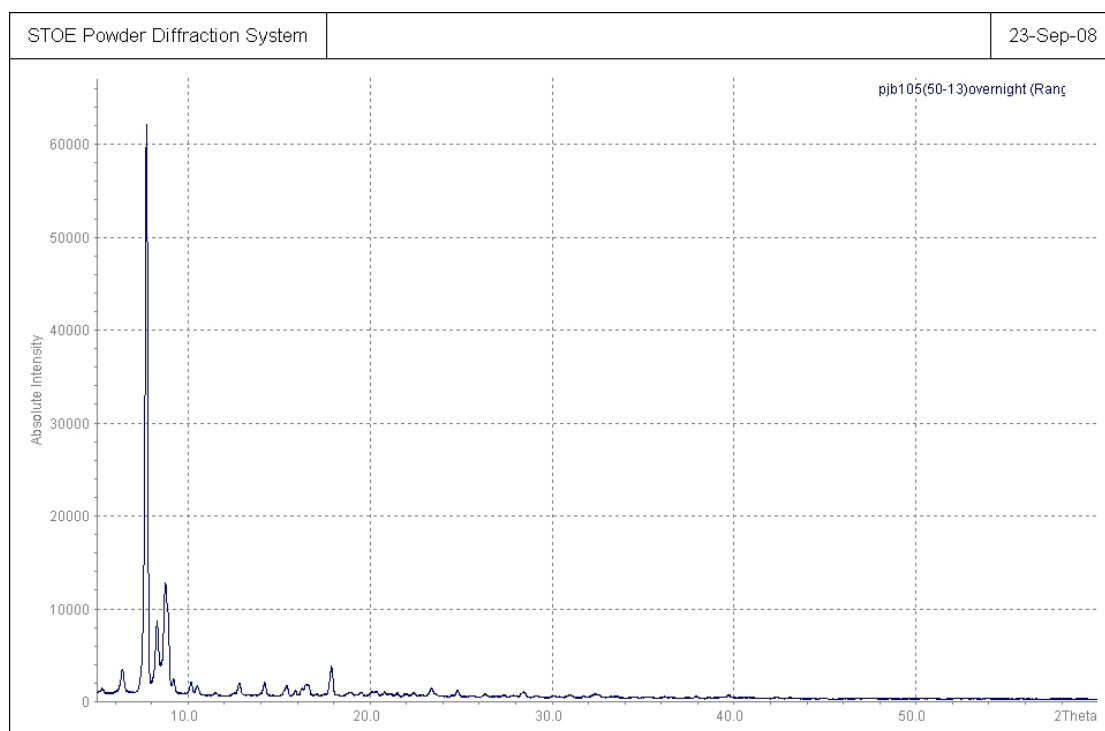

**Figure 3:** Powder diffraction of compound 2.

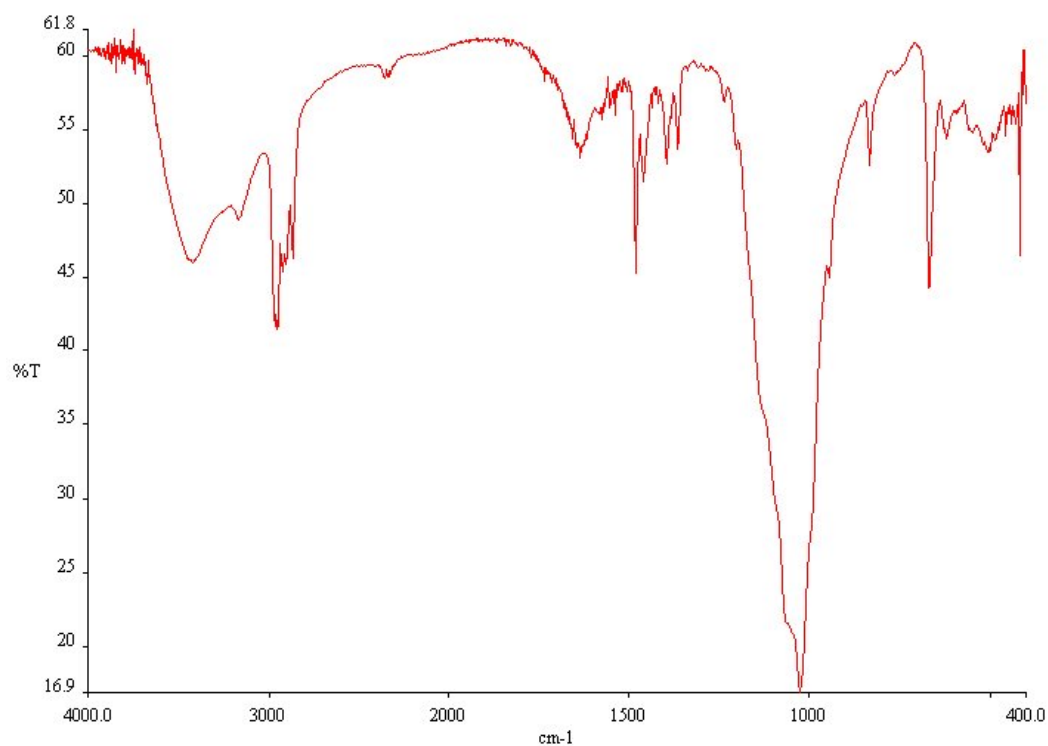

**Figure 4:** IR of compound 2.

**Table 2:** Hydrogen bond table for compound 2, bond, bond length and angle.

|                   |      |      |           |     |
|-------------------|------|------|-----------|-----|
| O32 -- H32 .. O12 | 0.82 | 1.75 | 2.494(12) | 150 |
|-------------------|------|------|-----------|-----|

**CHN analysis**

Theoretical in brackets

C= 27.49% (30.5%), H= 4.86% (5.7%), N=2.35% (1.8%)
